# Supplementary material for: Understanding Physical Activity Behavior in Ghanaian Adults with Type 2 Diabetes: A Qualitative Descriptive Study
Source: MDPI journal article supplement (doi:10.3390/jfmk8030127), 2023-09-05
Supplement: s1 [file s1]

**Supplementary file S1. Interview guide for consumers**

**Section A**

1. Which adult group do you belong?
  - a. 18-39 years ☐
  - b. 40-54 years ☐
  - c. 55-70 years ☐
  - d. above 70 years ☐
2. What is your gender?
  - a. Male ☐
  - b. Female ☐
  - c. Prefer not to disclose ☐
3. What is your marital status?
  - a. Never married ☐
  - b. Married ☐
  - c. Cohabiting ☐
  - d. Previously married ☐
  - e. Prefer not to disclose ☐
4. What is your employment status?
  - a. Employed ☐
  - b. Not employed or retired ☐
5. Which part of Ghana do you live?
  - a. Urban area (major cities like Accra, Kumasi, Tamale or district capital like Bekwai, Dodowa)
  - b. Rural area (not within major cities or district capital)
6. What is your highest education level?
  - a. No formal education/ Primary ☐
  - b. Secondary ☐
  - c. Tertiary or above ☐
7. Has your doctor or nurse informed you that you have type 2 diabetes?
  - a. Yes ☐
  - b. No ☐
8. If you answered 'Yes' to question 2, how long have you been diagnosed with type 2 diabetes? -  
\_\_\_\_\_
9. How active are you?
  - a. Inactive ☐
  - b. Moderately active ☐
  - c. Highly active ☐

## Section B

- 
- Tell me more about the type of exercise you do on a weekly basis
  - Tell me about your exercise goals
  - What encourages you to exercise?
  - Tell me more about what discourages you to exercise
  - What can be done to support you to overcome exercise barriers?
  - What things increase or decrease your self-confidence for being physically active?
  - How do you know if you have achieved the amount of exercise you want to achieve?
-
